# Supplementary material
Source: PubMed Central journal article supplement (PMC7582212)
Supplement: mmc1.pdf [file mmc1.pdf]

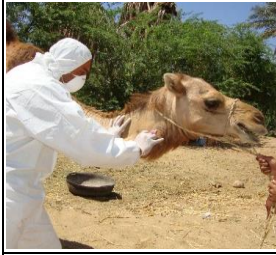

## Global Health at the Human-Animal-Ecosystem Interface

### General Introduction

#### Section 1 - Global Health at the Human-Animal-Ecosystem Interface: The Need for Intersectoral Approaches

| Video-lecture                                                                                      | Expert and Affiliation                                                                                                                     |
|----------------------------------------------------------------------------------------------------|--------------------------------------------------------------------------------------------------------------------------------------------|
| The importance of One Health for Global Health                                                     | Prof. Arnaud Fontanet<br>Director Center for Global Health<br>Head of Emerging Diseases Epidemiology Unit<br>Institut Pasteur, France      |
| The Tripartite Collaboration: FAO-OIE-WHO                                                          | Dr. Kazuaki Miyagishima<br>Director, Department of Food Safety and Zoonoses<br>World Health Organization (WHO)                             |
| Cross-Sectoral, Multidisciplinary Risk Assessment for Health Threats at the Human-Animal Interface | Dr. Elizabeth Mumford<br>Human-Animal Interface<br>Department of Global Capacities, Alert, and Response<br>World Health Organization (WHO) |
| How to link Global Health Priorities with Biodiversity?                                            | Dr. Maria Neira<br>Director<br>Public Health and the Environment Department<br>World Health Organization (WHO)                             |
| Global Animal Trade: Health Risks and Regulations                                                  | Dr. John Berezowski<br>Veterinary Public Health Institute<br>Vetsuisse Faculty<br>University of Bern, Switzerland                          |
| Sendai Framework for Disaster Risk Reduction & Health                                              | Dr. Chadia Wannous<br>The United Nations Office for Disaster Risk Reduction (UNISDR)                                                       |

#### Section 2 - Emerging Infectious Diseases

| Video-lecture                                                                                                   | Expert and Affiliation                                                                                                                                                                     |
|-----------------------------------------------------------------------------------------------------------------|--------------------------------------------------------------------------------------------------------------------------------------------------------------------------------------------|
| Challenges for the Spread of Emerging Viruses                                                                   | Prof. Laurent Kaiser<br>Head of the Division of Infectious Diseases<br>Director of the Laboratory of Virology<br>University Hospitals of Geneva (HUG)<br>University of Geneva, Switzerland |
| Investigating Emerging Zoonotic Outbreaks: Importance of the One Health Approach                                | Dr. Maria van Kerkhove<br>Head of the Outbreak Investigation Taskforce<br>Center for Global Health,<br>Institut Pasteur, France                                                            |
| Institute Pasteur Global Network & the fight against Emerging Infections                                        | Dr. Marc Jouan<br>Director of the International Affairs Department<br>Institut Pasteur, France                                                                                             |
| IHR 3.0 Simulator: Improving our Response to Global Health Emergencies                                          | Prof. Antoine Flahault<br>Director, Institute of Global Health<br>Faculty of Medicine, University of Geneva                                                                                |
| Disease Ecology of Nipah Virus in Cambodia: Exploring Bat Population Dynamics at the Frontline of the Emergence | Dr. Julien Cappelle<br>Centre de coopération internationale en recherche agronomique pour le développement (CIRAD)<br>Institut Pasteur, Cambodia                                           |

|                                                                                 |                                                                                                                                                  |
|---------------------------------------------------------------------------------|--------------------------------------------------------------------------------------------------------------------------------------------------|
| Disease Ecology of Nipah Virus in Cambodia: Exploring the Human-Bat Interface   | Dr. Julien Cappelle<br>Centre de coopération internationale en recherche agronomique pour le développement (CIRAD)<br>Institut Pasteur, Cambodia |
| Fight against VBDs: Global Change & the Need for an Interdisciplinary Approach  | Prof. Antoine Flahault<br>Director, Institute of Global Health<br>Faculty of Medicine, University of Geneva, Switzerland                         |
| The Reversed Spill-over: From Humans and Domestic Animals to Wildlife           | Dr. Geoffroy Mauvais<br>Program on African Protected Areas and Conservation (PAPACO)<br>International Union for Conservation of Nature (IUCN)    |
| The Importance of Understanding Animal Behaviour for Global Health              | Dr. Rafael Ruiz de Castañeda<br>Institute of Global Health<br>Faculty of Medicine, University of Geneva, Switzerland                             |
| Bushmeat & Emerging Infectious Diseases: Joint conservation & Health Strategies | Dr. Geoffroy Mauvais<br>Program on African Protected Areas and Conservation (PAPACO)<br>International Union for Conservation of Nature (IUCN)    |
| Social Anthropology of Zoonoses                                                 | Dr. Tamara Giles-Vernick<br>Medical Anthropology and Environment Group<br>Institut Pasteur, France                                               |

### Section 3 - Antimicrobial Resistance & Zoonotic Foodborne Infectious Diseases

| Video-lecture                                                                                   | Expert and Affiliation                                                                                                       |
|-------------------------------------------------------------------------------------------------|------------------------------------------------------------------------------------------------------------------------------|
| The Global Burden of Antimicrobial Resistance                                                   | Dr. Elisabeth Tayler<br>AntiMicrobial Resistance Secretariat<br>World Health Organization (WHO)                              |
| WHO Global Action Plan on Antimicrobial Resistance                                              | Dr. Elisabeth Tayler<br>AntiMicrobial Resistance Secretariat<br>World Health Organization (WHO)                              |
| Canadian Integrated Program for Antimicrobial Resistance Surveillance (CIPARS)                  | Prof. Andre Ravel<br>Faculty of Veterinary Medicine<br>University of Montreal, Canada                                        |
| Why should we care about Multi-Resistant Bacteria? Clinical Impact & Public Health Implications | Prof. Stephan Harbarth<br>Infection Control Programme<br>University Hospitals of Geneva<br>University of Geneva, Switzerland |
| Antimicrobial Resistance in Foodborne Infections: Importance of the One Health approach         | Dr. Simon Le Hello<br>Co-director National Reference Center E. coli/Shigella/Salmonella<br>Institut Pasteur, France          |
| FoodNet Canada: Why is this important?                                                          | Prof. Andre Ravel<br>Faculty of Veterinary Medicine<br>University of Montreal, Canada                                        |

### Section 4 - Zoonotic Neglected Infectious Diseases

| Video-lecture                                                                | Expert and Affiliation                                                                                                                                                                     |
|------------------------------------------------------------------------------|--------------------------------------------------------------------------------------------------------------------------------------------------------------------------------------------|
| Neglected Tropical Diseases & Zoonosis: Challenges & Solutions               | Dr. Bernadette Abela-Ridder<br>Team Leader, Neglected Zoonotic Diseases<br>Department of the Control of Neglected Tropical Diseases<br>World Health Organization (WHO)                     |
| Towards Rabies Elimination: The case of KwaZulu-Natal (South Africa)         | Kevin Le Roux<br>Rabies Project Manager<br>Department of Agriculture and Rural Development<br>KwaZulu-Natal, South Africa                                                                  |
| Major Research Challenges & Opportunities in the fight against Rabies        | Dr. Hervé Bourhy<br>Unit Lyssavirus dynamics and host adaptation,<br>WHO Collaborating Centre for Research on Rabies,<br>National Reference Centre for Rabies,<br>Institut Pasteur, France |
| Research & Innovation: Examples from Institut Pasteur's fight against Rabies | Dr. Hervé Bourhy<br>Unit Lyssavirus dynamics and host adaptation,<br>WHO Collaborating Centre for Research on Rabies,<br>National Reference Centre for Rabies,<br>Institut Pasteur, France |

|                                                       |                                                                                                                                                                       |
|-------------------------------------------------------|-----------------------------------------------------------------------------------------------------------------------------------------------------------------------|
| Ecodog: A One health and Ecohealth approach to Rabies | Prof. Andre Ravel<br>Faculty of Veterinary Medicine<br>University of Montreal, Canada                                                                                 |
| One Health fight against Leishmaniasis                | Prof. Afif Ben Salah<br>Head, Department of Medical Epidemiology<br>Institut Pasteur, Tunisia                                                                         |
| Zoonotic Tuberculosis in the WHO End TB Strategy      | Dr. Mario Raviglione<br>Director<br>Global TB Programme<br>World Health Organization (WHO)<br>Dr. Anna Dean<br>Global TB Programme<br>World Health Organization (WHO) |

## Section 5 - Conflicts & Injuries

| Video-lecture                                                               | Expert and Affiliation                                                                                                                                       |
|-----------------------------------------------------------------------------|--------------------------------------------------------------------------------------------------------------------------------------------------------------|
| Protected Areas: How to manage Human-Wildlife-Domestic Animals Interface?   | Dr. Geoffroy Mauvais<br>Program on African Protected Areas and Conservation (PAPACO)<br>International Union for Conservation of Nature (IUCN)                |
| Snake-bites: A Neglected Global Health Challenge                            | Prof. François Chappuis<br>Head of the Division of Tropical and Humanitarian Medicine<br>University Hospitals of Geneva<br>University of Geneva, Switzerland |
| Snake-bites in Sub-Saharan Africa: A priority for "Doctors Without Borders" | Dr. Gabriel Alcoba<br><i>Médecins sans Frontières</i> and<br>Division of Tropical and Humanitarian Medicine<br>University Hospitals of Geneva, Switzerland   |
| Impact of Snake-bites in Livestock: The Case of Costa Rica                  | Dr. Maria Herrera<br>Instituto Clodomiro Picado<br>San Jose, Costa Rica                                                                                      |

## Section 6 - Innovation & Opportunities

| Video-lecture                                                         | Expert and Affiliation                                                                                                                                            |
|-----------------------------------------------------------------------|-------------------------------------------------------------------------------------------------------------------------------------------------------------------|
| Citizen Science & Crowdsourcing: Opportunities & Challenges in Health | Prof. François Grey<br>Partnership Coordinator, Citizen Cyberlab<br>University of Geneva, Switzerland                                                             |
| Digital Epidemiology: Opportunities & Challenges in Global Health     | Prof. Marcel Salathe<br>Head of the Laboratory of Digital Epidemiology<br>School of Life Sciences<br>Ecole Polytechnique Fédérale de Lausanne (EPFL), Switzerland |

## Section 7 - Health Benefits at the Human-Animal-Ecosystem Interface

| Video-lecture                                                                                       | Expert and Affiliation                                                                                                              |
|-----------------------------------------------------------------------------------------------------|-------------------------------------------------------------------------------------------------------------------------------------|
| What is Environmental Health? A Historical overview                                                 | Dr. Jean Simos<br>Institute of Global Health<br>Faculty of Medicine<br>University of Geneva, Switzerland                            |
| Ecosystem Services & Health                                                                         | Dr. Martin Schlaepfer<br>Institute of Environmental Sciences<br>University of Geneva, Switzerland                                   |
| Growing with Nature: Implications for Child Health & Allergies                                      | Dr. Caroline Roduit<br>Children's Hospital<br>Allergy Research Group<br>University of Zurich, Switzerland                           |
| Biodiversity as a Source of Food for Humans and Animals: Socio-cultural Determinants of Food Habits | Dr. Estelle Fourat<br>Research Centre on Work, Organizations and Policies<br>CERTOP<br>University of Toulouse – Jean Jaurès, France |
| Companion Animal Ownership: Benefits for Human and Animal Health                                    | Dr. Dennis Turner<br>Director<br>Institute for Applied Ethology and Animal Psychology<br>Horgen/Zurich, Switzerland                 |

|                                                     |                                                                                                                     |
|-----------------------------------------------------|---------------------------------------------------------------------------------------------------------------------|
| Companion Animals & Economic Benefits of One Health | Dr. Dennis Turner<br>Director<br>Institute for Applied Ethology and Animal Psychology<br>Horgen/Zurich, Switzerland |
|-----------------------------------------------------|---------------------------------------------------------------------------------------------------------------------|

## Section 8 - Management of Ecosystems under Global Changes: Implication for Human Health

| Video-lecture                                                                                                       | Expert and Affiliation                                                                                                                                                |
|---------------------------------------------------------------------------------------------------------------------|-----------------------------------------------------------------------------------------------------------------------------------------------------------------------|
| Increasing Health Sector Resilience to Climate Change and Disaster Risk: the Value of Biodiversity and Ecosystems   | Dr. Tedros Adhanom Ghebreyesus<br>Director-General<br>World Health Organization (WHO)                                                                                 |
| Connecting Global Priorities: Biodiversity and Human Health                                                         | Ms. Cristina Romanelli<br>UN Convention on Biological Diversity (CBD) - World Health Organization (WHO) joint programme                                               |
| Harnessing Biodiversity to Maximize Health Co-benefits in Agroecosystems                                            | Dr. David Cooper<br>Deputy Executive Secretary<br>UN Convention on Biological Diversity (CBD)                                                                         |
| Biodiversity and Human Health Linkages: Concepts, Determinants, Drivers of Change and Approaches to Integration     | Dr. Diarmid Campbell-Lendrum<br>Department of Public Health and Environment<br>World Health Organization (WHO)                                                        |
| Global Overview of the United Nations Decade of Action on Nutrition                                                 | Dr. Francesco Branca<br>Department of Nutrition for Health and Development<br>World Health Organization (WHO)                                                         |
| Food Systems, Nutrition and Climate Change: The Need for a Cross-sectoral Approach                                  | Ms. Lina Mahy<br>Department of Nutrition for Health and Development<br>World Health Organization (WHO)                                                                |
| Agrobiodiversity for Healthy, Diverse Diets and Food Systems. Case Studies from Brazil, Turkey, Kenya and Sri Lanka | Dr. Daniela Moura<br>National project lead<br>Biodiversity for Food and Nutrition, Brazil                                                                             |
| Sustainable Oceans Management and Health                                                                            | Dr. Jake Rice<br>Senior Scientist Emeritus<br>Department of Fisheries and Oceans, Canada                                                                              |
| Sustainable Management of Agroecosystems and Health                                                                 | Dr. Scott Newman<br>Senior Animal Health & Production Officer<br>Regional Office for Africa<br>Food and Agriculture Organization of the United Nations<br>Accra Ghana |
| The Role of Sustainably Managed Seascapes/Landscapes in Health and Nutritional Outcomes                             | Dr. Christopher Golden<br>Assistant Professor of Planetary Health and Nutrition<br>Harvard T.H. Chan School of Public Health, Boston                                  |
| Gender and Health in the Face of Global Environmental Change                                                        | Ms. Elena Villalobos Prats<br>Department of Public Health and Environment<br>World Health Organization (WHO)                                                          |
